# Supplementary material for: Spectroscopic detection of gas-phase HOSO2
Source: Royal Society of Chemistry journal article supplement (doi:10.1039/d1cp04199a), 2021-01-01
Supplement: d1cp04199a1.pdf [file d1cp04199a1.pdf]

# Electronic Supplementary Information: Spectroscopic Detection of Gas-Phase HOSO<sub>2</sub>

Masakazu Nakajima<sup>\*,†</sup> and Yasuki Endo<sup>\*,‡</sup>

*Department of Basic Science, The University of Tokyo, 3-8-1 Komaba, Meguro-ku, Tokyo  
153-8902, Japan, and Department of Applied Chemistry, National Yang Ming Chiao Tung  
University, 1001 Ta-Hsueh Rd., Hsinchu 300098, Taiwan*

E-mail: nakajima@bunshi.c.u-tokyo.ac.jp; endo@nctu.edu.tw

## List of Contents

- # Table S-I: Observed line frequencies of HOSO<sub>2</sub> and their assignments
- # Table S-II: Observed line frequencies of DOSO<sub>2</sub> and their assignments
- # A model calculation for the *C* constant of HOSO<sub>2</sub>

---

\*To whom correspondence should be addressed

<sup>†</sup>The University of Tokyo

<sup>‡</sup>National Yang Ming Chiao Tung University

Table S-I: Observed line frequencies of HOSO<sub>2</sub> and their assignments.

| $N'$                 | $K'_a$ | $K'_c$ | $J'$ | $F'$ | $N''$ | $K''_a$ | $K''_c$ | $J''$ | $F''$ | obs. freq. <sup>a</sup> (MHz) | o.-c. (kHz) |
|----------------------|--------|--------|------|------|-------|---------|---------|-------|-------|-------------------------------|-------------|
| $0^- \leftarrow 0^+$ |        |        |      |      |       |         |         |       |       |                               |             |
| 1                    | 0      | 1      | 1.5  | 1    | 0     | 0       | 0       | 0.5   | 0     | 14040.362                     | 1           |
|                      |        |        | 1.5  | 2    |       |         |         | 0.5   | 1     | 14041.186                     | -1          |
|                      |        |        | 1.5  | 1    |       |         |         | 0.5   | 1     | 14047.273                     | -0          |
|                      |        |        | 0.5  | 0    |       |         |         | 0.5   | 1     | 14068.138                     | -3          |
|                      |        |        | 0.5  | 1    |       |         |         | 0.5   | 0     | 14071.815                     | -0          |
|                      |        |        | 0.5  | 1    |       |         |         | 0.5   | 1     | 14078.727                     | -2          |
| $0^+ \leftarrow 0^-$ |        |        |      |      |       |         |         |       |       |                               |             |
| 1                    | 0      | 1      | 1.5  | 1    | 0     | 0       | 0       | 0.5   | 0     | 14000.242                     | 2           |
|                      |        |        | 1.5  | 2    |       |         |         | 0.5   | 1     | 14001.116                     | -0          |
|                      |        |        | 1.5  | 1    |       |         |         | 0.5   | 1     | 14007.153                     | 1           |
|                      |        |        | 0.5  | 0    |       |         |         | 0.5   | 1     | 14032.247                     | 3           |
|                      |        |        | 0.5  | 1    |       |         |         | 0.5   | 0     | 14035.743                     | 1           |
|                      |        |        | 0.5  | 1    |       |         |         | 0.5   | 1     | 14042.654                     | 1           |
| $0^+ \leftarrow 0^+$ |        |        |      |      |       |         |         |       |       |                               |             |
| 1                    | 1      | 0      | 1.5  | 1    | 0     | 0       | 0       | 0.5   | 0     | 18490.943                     | -2          |
|                      |        |        | 1.5  | 2    |       |         |         | 0.5   | 1     | 18494.666                     | -0          |
|                      |        |        | 1.5  | 1    |       |         |         | 0.5   | 1     | 18497.856                     | -2          |
|                      |        |        | 0.5  | 1    |       |         |         | 0.5   | 0     | 18524.771                     | 1           |
|                      |        |        | 0.5  | 1    |       |         |         | 0.5   | 1     | 18531.688                     | 5           |
|                      |        |        | 0.5  | 0    |       |         |         | 0.5   | 1     | 18533.505                     | 2           |
| $0^- \leftarrow 0^-$ |        |        |      |      |       |         |         |       |       |                               |             |
| 1                    | 1      | 0      | 1.5  | 1    | 0     | 0       | 0       | 0.5   | 0     | 18490.923                     | 0           |
|                      |        |        | 1.5  | 2    |       |         |         | 0.5   | 1     | 18494.646                     | -0          |
|                      |        |        | 1.5  | 1    |       |         |         | 0.5   | 1     | 18497.835                     | -1          |
|                      |        |        | 0.5  | 1    |       |         |         | 0.5   | 0     | 18524.750                     | -0          |
|                      |        |        | 0.5  | 1    |       |         |         | 0.5   | 1     | 18531.658                     | -6          |
|                      |        |        | 0.5  | 0    |       |         |         | 0.5   | 1     | 18533.485                     | 2           |
| $0^+ \leftarrow 0^+$ |        |        |      |      |       |         |         |       |       |                               |             |
| 1                    | 1      | 1      | 0.5  | 1    | 0     | 0       | 0       | 0.5   | 0     | 14294.803 <sup>b</sup>        | -4          |
|                      |        |        | 1.5  | 2    |       |         |         | 0.5   | 1     | 14301.727 <sup>c</sup>        | -3          |
|                      |        |        | 0.5  | 1    |       |         |         | 0.5   | 1     | 14301.727 <sup>c</sup>        | 7           |
|                      |        |        | 1.5  | 1    |       |         |         | 0.5   | 0     | 14302.518                     | 2           |
|                      |        |        | 0.5  | 0    |       |         |         | 0.5   | 1     | 14306.723                     | -1          |

Table S-I (*continue*)

| $N'$                 | $K'_a$ | $K'_c$ | $J'$ | $F'$ | $N''$ | $K''_a$ | $K''_c$ | $J''$ | $F''$ | obs. freq. <sup>a</sup> (MHz) | o.-c. (kHz) |
|----------------------|--------|--------|------|------|-------|---------|---------|-------|-------|-------------------------------|-------------|
| $0^- \leftarrow 0^-$ |        |        |      |      |       |         |         |       |       |                               |             |
| 1                    | 1      | 1      | 0.5  | 1    | 0     | 0       | 0       | 0.5   | 1     | 14290.696                     | -1          |
|                      |        |        | 1.5  | 1    |       |         |         | 0.5   | 0     | 14292.530                     | 2           |
|                      |        |        | 1.5  | 2    |       |         |         | 0.5   | 1     | 14293.195                     | -1          |
|                      |        |        | 0.5  | 0    |       |         |         | 0.5   | 1     | 14294.018                     | -0          |
| $0^+ \leftarrow 0^+$ |        |        |      |      |       |         |         |       |       |                               |             |
| 1                    | 1      | 0      | 1.5  | 2    | 1     | 0       | 1       | 1.5   | 2     | 4469.240 <sup>d</sup>         | 2           |
|                      |        |        | 1.5  | 1    |       |         |         | 1.5   | 2     | 4472.429 <sup>d</sup>         | 0           |
|                      |        |        | 0.5  | 1    |       |         |         | 1.5   | 2     | 4506.256 <sup>d</sup>         | 1           |
| $0^- \leftarrow 0^-$ |        |        |      |      |       |         |         |       |       |                               |             |
| 1                    | 1      | 0      | 1.5  | 2    | 1     | 0       | 1       | 1.5   | 2     | 4477.772 <sup>d</sup>         | 0           |
|                      |        |        | 1.5  | 1    |       |         |         | 1.5   | 2     | 4480.963 <sup>d</sup>         | 2           |
|                      |        |        | 0.5  | 1    |       |         |         | 1.5   | 2     | 4514.788 <sup>d</sup>         | -0          |
| $0^+ \leftarrow 0^+$ |        |        |      |      |       |         |         |       |       |                               |             |
| 2                    | 0      | 2      | 2.5  | 3    | 1     | 1       | 1       | 1.5   | 2     | 23838.367                     | 0           |
|                      |        |        | 2.5  | 2    |       |         |         | 1.5   | 1     | 23835.740                     | 2           |
|                      |        |        | 2.5  | 2    |       |         |         | 1.5   | 2     | 23843.456 <sup>c</sup>        | 18          |
|                      |        |        | 2.5  | 2    |       |         |         | 0.5   | 1     | 23843.456 <sup>c</sup>        | 8           |
|                      |        |        | 1.5  | 1    |       |         |         | 0.5   | 0     | 23853.588                     | 1           |
|                      |        |        | 1.5  | 2    |       |         |         | 1.5   | 1     | 23856.791                     | -3          |
|                      |        |        | 1.5  | 1    |       |         |         | 1.5   | 2     | 23858.595 <sup>c</sup>        | 13          |
|                      |        |        | 1.5  | 1    |       |         |         | 0.5   | 1     | 23858.595 <sup>c</sup>        | 3           |
|                      |        |        | 1.5  | 2    |       |         |         | 1.5   | 2     | 23864.501 <sup>c</sup>        | 8           |
|                      |        |        | 1.5  | 2    |       |         |         | 0.5   | 1     | 23864.501 <sup>c</sup>        | -2          |
| $0^- \leftarrow 0^-$ |        |        |      |      |       |         |         |       |       |                               |             |
| 2                    | 0      | 2      | 2.5  | 2    | 1     | 1       | 1       | 1.5   | 1     | 23848.683                     | -3          |
|                      |        |        | 2.5  | 3    |       |         |         | 1.5   | 2     | 23849.910                     | -2          |
|                      |        |        | 2.5  | 2    |       |         |         | 1.5   | 2     | 23854.930                     | 0           |
|                      |        |        | 2.5  | 2    |       |         |         | 0.5   | 1     | 23857.430                     | 1           |
|                      |        |        | 1.5  | 1    |       |         |         | 0.5   | 0     | 23868.320                     | 2           |
|                      |        |        | 1.5  | 2    |       |         |         | 1.5   | 1     | 23868.771                     | -2          |
|                      |        |        | 1.5  | 1    |       |         |         | 0.5   | 1     | 23871.643                     | 3           |
|                      |        |        | 1.5  | 2    |       |         |         | 1.5   | 2     | 23875.015                     | -2          |
|                      |        |        | 1.5  | 2    |       |         |         | 0.5   | 1     | 23877.519                     | 2           |
| $0^- \leftarrow 0^+$ |        |        |      |      |       |         |         |       |       |                               |             |

Table S-I (*continue*)

| $N'$                 | $K'_a$ | $K'_c$ | $J'$ | $F'$ | $N''$ | $K''_a$ | $K''_c$ | $J''$ | $F''$ | obs. freq. <sup>a</sup> (MHz) | o.-c. (kHz) |
|----------------------|--------|--------|------|------|-------|---------|---------|-------|-------|-------------------------------|-------------|
| 2                    | 1      | 2      | 2.5  | 2    | 1     | 1       | 1       | 1.5   | 1     | 23860.820                     | -0          |
|                      |        |        | 2.5  | 3    |       |         |         | 1.5   | 2     | 23863.482                     | -2          |
|                      |        |        | 2.5  | 2    |       |         |         | 0.5   | 1     | 23868.537                     | 7           |
|                      |        |        | 1.5  | 1    |       |         |         | 0.5   | 0     | 23875.868                     | -2          |
|                      |        |        | 1.5  | 2    |       |         |         | 1.5   | 1     | 23879.173                     | -1          |
| $0^+ \leftarrow 0^+$ |        |        |      |      |       |         |         |       |       |                               |             |
| 2                    | 1      | 2      | 1.5  | 1    | 1     | 0       | 1       | 0.5   | 1     | 24089.312                     | 2           |
|                      |        |        | 1.5  | 2    |       |         |         | 0.5   | 1     | 24095.353                     | 1           |
|                      |        |        | 1.5  | 1    |       |         |         | 0.5   | 0     | 24099.721                     | -0          |
|                      |        |        | 2.5  | 2    |       |         |         | 1.5   | 1     | 24111.537                     | -1          |
|                      |        |        | 2.5  | 3    |       |         |         | 1.5   | 2     | 24112.478                     | -3          |
|                      |        |        | 2.5  | 2    |       |         |         | 1.5   | 2     | 24117.571                     | -3          |
|                      |        |        | 1.5  | 1    |       |         |         | 1.5   | 1     | 24124.812                     | -0          |
|                      |        |        | 1.5  | 2    |       |         |         | 1.5   | 2     | 24136.893                     | 3           |
| $0^- \leftarrow 0^-$ |        |        |      |      |       |         |         |       |       |                               |             |
| 2                    | 1      | 2      | 1.5  | 1    | 1     | 0       | 1       | 0.5   | 1     | 24103.866                     | 1           |
|                      |        |        | 1.5  | 2    |       |         |         | 0.5   | 1     | 24109.875                     | 0           |
|                      |        |        | 1.5  | 1    |       |         |         | 0.5   | 0     | 24114.451                     | -2          |
|                      |        |        | 2.5  | 2    |       |         |         | 1.5   | 1     | 24122.976                     | 1           |
|                      |        |        | 2.5  | 3    |       |         |         | 1.5   | 2     | 24124.023                     | -4          |
|                      |        |        | 2.5  | 2    |       |         |         | 1.5   | 2     | 24129.063                     | 1           |
|                      |        |        | 1.5  | 1    |       |         |         | 1.5   | 1     | 24135.323                     | 2           |
|                      |        |        | 1.5  | 2    |       |         |         | 1.5   | 2     | 24147.416                     | -1          |
| $0^+ \leftarrow 0^-$ |        |        |      |      |       |         |         |       |       |                               |             |
| 2                    | 0      | 2      | 1.5  | 2    | 1     | 0       | 1       | 0.5   | 1     | 24087.495                     | 1           |
|                      |        |        | 2.5  | 2    |       |         |         | 1.5   | 1     | 24097.895                     | 1           |
|                      |        |        | 2.5  | 3    |       |         |         | 1.5   | 2     | 24098.908                     | -1          |
| $0^+ \leftarrow 0^+$ |        |        |      |      |       |         |         |       |       |                               |             |
| 2                    | 1      | 1      | 2.5  | 3    | 1     | 0       | 1       | 1.5   | 2     | 36730.629 <sup>d</sup>        | 9           |
|                      |        |        | 2.5  | 2    |       |         |         | 1.5   | 2     | 36735.491 <sup>d</sup>        | 6           |
|                      |        |        | 1.5  | 1    |       |         |         | 1.5   | 2     | 36809.840 <sup>d</sup>        | 0           |
|                      |        |        | 1.5  | 2    |       |         |         | 1.5   | 2     | 36814.715 <sup>d</sup>        | -2          |
| $0^- \leftarrow 0^-$ |        |        |      |      |       |         |         |       |       |                               |             |
| 2                    | 1      | 1      | 2.5  | 3    | 1     | 0       | 1       | 1.5   | 2     | 36730.254 <sup>d</sup>        | -5          |
|                      |        |        | 2.5  | 2    |       |         |         | 1.5   | 2     | 36735.137 <sup>d</sup>        | -9          |

Table S-I (*continue*)

| $N'$                 | $K'_a$ | $K'_c$ | $J'$ | $F'$ | $N''$ | $K''_a$ | $K''_c$ | $J''$ | $F''$ | obs. freq. <sup>a</sup> (MHz) | o.-c. (kHz) |
|----------------------|--------|--------|------|------|-------|---------|---------|-------|-------|-------------------------------|-------------|
|                      |        |        | 1.5  | 1    |       |         |         | 1.5   | 2     | 36807.299 <sup>d</sup>        | 0           |
|                      |        |        | 1.5  | 2    |       |         |         | 1.5   | 2     | 36812.222 <sup>d</sup>        | -1          |
| $0^- \leftarrow 0^+$ |        |        |      |      |       |         |         |       |       |                               |             |
| 2                    | 2      | 0      | 2.5  | 3    | 1     | 0       | 1       | 1.5   | 2     | 41506.713 <sup>d</sup>        | 5           |
|                      |        |        | 2.5  | 2    |       |         |         | 1.5   | 2     | 41509.260 <sup>d</sup>        | 5           |
|                      |        |        | 1.5  | 1    |       |         |         | 0.5   | 1     | 41524.184 <sup>d</sup>        | 3           |
|                      |        |        | 1.5  | 2    |       |         |         | 0.5   | 1     | 41524.308 <sup>d</sup>        | 1           |
|                      |        |        | 1.5  | 2    |       |         |         | 1.5   | 2     | 41565.848 <sup>d</sup>        | 3           |
| $0^+ \leftarrow 0^-$ |        |        |      |      |       |         |         |       |       |                               |             |
| 2                    | 2      | 0      | 2.5  | 3    | 1     | 0       | 1       | 1.5   | 2     | 41466.716 <sup>d</sup>        | -3          |
|                      |        |        | 2.5  | 2    |       |         |         | 1.5   | 2     | 41469.264 <sup>d</sup>        | -4          |
|                      |        |        | 1.5  | 1    |       |         |         | 0.5   | 1     | 41488.188 <sup>d</sup>        | -1          |
|                      |        |        | 1.5  | 2    |       |         |         | 0.5   | 1     | 41488.311 <sup>d</sup>        | -3          |
|                      |        |        | 1.5  | 2    |       |         |         | 1.5   | 2     | 41525.849 <sup>d</sup>        | -7          |
| $0^+ \leftarrow 0^+$ |        |        |      |      |       |         |         |       |       |                               |             |
| 2                    | 2      | 1      | 2.5  | 3    | 1     | 1       | 1       | 1.5   | 2     | 37267.319 <sup>e</sup>        | 35          |
|                      |        |        | 2.5  | 2    |       |         |         | 1.5   | 2     | 37268.240 <sup>d</sup>        | -1          |
|                      |        |        | 1.5  | 2    |       |         |         | 1.5   | 2     | 37289.471 <sup>d</sup>        | -6          |
|                      |        |        | 1.5  | 1    |       |         |         | 1.5   | 2     | 37290.396 <sup>e</sup>        | 19          |
| $0^- \leftarrow 0^-$ |        |        |      |      |       |         |         |       |       |                               |             |
| 2                    | 2      | 1      | 2.5  | 3    | 1     | 1       | 1       | 1.5   | 2     | 37266.958 <sup>d</sup>        | -6          |
|                      |        |        | 2.5  | 2    |       |         |         | 1.5   | 2     | 37267.822 <sup>d</sup>        | 1           |
|                      |        |        | 1.5  | 2    |       |         |         | 1.5   | 2     | 37287.151 <sup>d</sup>        | 5           |
|                      |        |        | 1.5  | 1    |       |         |         | 1.5   | 2     | 37287.884 <sup>d</sup>        | 7           |

<sup>a</sup> Lines without superscript letter were observed by FTMW spectroscopy, and estimated error of 3 kHz are given in the least-squares analysis using the spfit program.

<sup>b</sup> Observed by the FTMW-MW double resonance technique. Estimated error of 20 kHz is given in the least-squares analysis.

<sup>c</sup> Overlapping peak. Not included in the least-squares analysis.

<sup>d</sup> Observed by the FTMW-MW double resonance technique. Estimated error of 6 kHz is given in the least-squares analysis.

<sup>e</sup> Not included in the least-squares analysis.

Table S-II: Observed line frequencies of DOSO<sub>2</sub> and their assignments.

| $N'$                 | $K'_a$ | $K'_c$ | $J'$ | $F'$ | $N''$ | $K''_a$ | $K''_c$ | $J''$ | $F''$ | obs. freq. <sup>a</sup> (MHz) | o.-c. (kHz) |
|----------------------|--------|--------|------|------|-------|---------|---------|-------|-------|-------------------------------|-------------|
| $0^+ \leftarrow 0^+$ |        |        |      |      |       |         |         |       |       |                               |             |
| 1                    | 0      | 1      | 1.5  | 1.5  | 0     | 0       | 0       | 0.5   | 0.5   | 13329.790 <sup>b</sup>        | 2           |
|                      |        |        | 1.5  | 2.5  |       |         |         | 0.5   | 1.5   | 13330.285                     | 1           |
|                      |        |        | 1.5  | 0.5  |       |         |         | 0.5   | 0.5   | 13330.470 <sup>b</sup>        | 4           |
|                      |        |        | 1.5  | 1.5  |       |         |         | 0.5   | 1.5   | 13331.519 <sup>c</sup>        | 1           |
|                      |        |        | 1.5  | 0.5  |       |         |         | 0.5   | 1.5   | 13332.195 <sup>c</sup>        | -1          |
|                      |        |        | 0.5  | 0.5  |       |         |         | 0.5   | 0.5   | 13334.197                     | -3          |
|                      |        |        | 0.5  | 0.5  |       |         |         | 0.5   | 1.5   | 13335.927 <sup>c</sup>        | -3          |
|                      |        |        | 0.5  | 1.5  |       |         |         | 0.5   | 0.5   | 13336.382                     | -1          |
|                      |        |        | 0.5  | 1.5  |       |         |         | 0.5   | 1.5   | 13338.080 <sup>b</sup>        | -33         |
| $0^- \leftarrow 0^-$ |        |        |      |      |       |         |         |       |       |                               |             |
| 1                    | 0      | 1      | 1.5  | 2.5  | 0     | 0       | 0       | 0.5   | 1.5   | 13330.228                     | -1          |
|                      |        |        | 1.5  | 1.5  |       |         |         | 0.5   | 1.5   | 13331.463 <sup>c</sup>        | 0           |
|                      |        |        | 1.5  | 0.5  |       |         |         | 0.5   | 1.5   | 13332.138 <sup>c</sup>        | -4          |
|                      |        |        | 0.5  | 0.5  |       |         |         | 0.5   | 0.5   | 13334.147                     | 2           |
|                      |        |        | 0.5  | 0.5  |       |         |         | 0.5   | 1.5   | 13335.879 <sup>c</sup>        | 4           |
|                      |        |        | 0.5  | 1.5  |       |         |         | 0.5   | 0.5   | 13336.332                     | 3           |
|                      |        |        | 0.5  | 1.5  |       |         |         | 0.5   | 1.5   | 13338.080 <sup>b</sup>        | 22          |
| $0^+ \leftarrow 0^+$ |        |        |      |      |       |         |         |       |       |                               |             |
| 1                    | 1      | 0      | 1.5  | 2.5  | 1     | 1       | 1       | 0.5   | 1.5   | 3828.473 <sup>d</sup>         | 1           |
|                      |        |        | 1.5  | 2.5  |       |         |         | 1.5   | 1.5   | 3856.959 <sup>d</sup>         | -4          |
|                      |        |        | 1.5  | 2.5  |       |         |         | 1.5   | 2.5   | 3857.794 <sup>d</sup>         | -1          |
| $0^- \leftarrow 0^-$ |        |        |      |      |       |         |         |       |       |                               |             |
| 1                    | 1      | 0      | 1.5  | 2.5  | 1     | 1       | 1       | 0.5   | 1.5   | 3828.519 <sup>d</sup>         | -1          |
|                      |        |        | 1.5  | 2.5  |       |         |         | 1.5   | 1.5   | 3857.021 <sup>d</sup>         | 10          |
|                      |        |        | 1.5  | 2.5  |       |         |         | 1.5   | 2.5   | 3857.845 <sup>d</sup>         | 2           |
| $0^+ \leftarrow 0^+$ |        |        |      |      |       |         |         |       |       |                               |             |
| 2                    | 0      | 2      | 2.5  | 2.5  | 1     | 0       | 1       | 1.5   | 1.5   | 23416.465 <sup>c</sup>        | -18         |
|                      |        |        | 2.5  | 1.5  |       |         |         | 1.5   | 0.5   | 23416.500 <sup>c</sup>        | -4          |
|                      |        |        | 2.5  | 3.5  |       |         |         | 1.5   | 2.5   | 23416.634 <sup>c</sup>        | 4           |
|                      |        |        | 2.5  | 1.5  |       |         |         | 1.5   | 1.5   | 23417.184 <sup>c</sup>        | 2           |
|                      |        |        | 2.5  | 2.5  |       |         |         | 1.5   | 2.5   | 23417.719 <sup>c</sup>        | 2           |
|                      |        |        | 1.5  | 1.5  |       |         |         | 0.5   | 1.5   | 23425.528 <sup>c</sup>        | 3           |
|                      |        |        | 1.5  | 2.5  |       |         |         | 0.5   | 1.5   | 23426.715 <sup>c</sup>        | 6           |

Table S-II (*continue*)

| $N'$                 | $K'_a$ | $K'_c$ | $J'$ | $F'$ | $N''$ | $K''_a$ | $K''_c$ | $J''$ | $F''$ | obs. freq. <sup>a</sup> (MHz) | o.-c. (kHz) |
|----------------------|--------|--------|------|------|-------|---------|---------|-------|-------|-------------------------------|-------------|
|                      |        |        | 1.5  | 0.5  |       |         |         | 0.5   | 0.5   | 23426.894 <sup>c</sup>        | 3           |
|                      |        |        | 1.5  | 1.5  |       |         |         | 0.5   | 0.5   | 23427.709 <sup>c</sup>        | 1           |
|                      |        |        | 1.5  | 1.5  |       |         |         | 1.5   | 1.5   | 23432.070 <sup>b</sup>        | -51         |
|                      |        |        | 1.5  | 2.5  |       |         |         | 1.5   | 2.5   | 23434.500 <sup>b</sup>        | -39         |
| $0^- \leftarrow 0^-$ |        |        |      |      |       |         |         |       |       |                               |             |
| 2                    | 0      | 2      | 2.5  | 2.5  | 1     | 0       | 1       | 1.5   | 1.5   | 23416.390 <sup>c</sup>        | -3          |
|                      |        |        | 2.5  | 1.5  |       |         |         | 1.5   | 0.5   | 23416.416 <sup>c</sup>        | 2           |
|                      |        |        | 2.5  | 3.5  |       |         |         | 1.5   | 2.5   | 23416.541 <sup>c</sup>        | 1           |
|                      |        |        | 2.5  | 1.5  |       |         |         | 1.5   | 1.5   | 23417.094 <sup>c</sup>        | 2           |
|                      |        |        | 2.5  | 2.5  |       |         |         | 1.5   | 2.5   | 23417.630 <sup>c</sup>        | 3           |
|                      |        |        | 1.5  | 1.5  |       |         |         | 0.5   | 1.5   | 23425.435 <sup>c</sup>        | 0           |
|                      |        |        | 1.5  | 2.5  |       |         |         | 0.5   | 1.5   | 23426.617 <sup>c</sup>        | -2          |
|                      |        |        | 1.5  | 0.5  |       |         |         | 0.5   | 0.5   | 23426.801 <sup>f</sup>        | -1          |
|                      |        |        | 1.5  | 1.5  |       |         |         | 0.5   | 0.5   | 23427.620 <sup>c</sup>        | 1           |
|                      |        |        | 1.5  | 1.5  |       |         |         | 1.5   | 1.5   | 23432.070 <sup>b</sup>        | 39          |
|                      |        |        | 1.5  | 2.5  |       |         |         | 1.5   | 2.5   | 23434.500 <sup>b</sup>        | 51          |
| $0^+ \leftarrow 0^+$ |        |        |      |      |       |         |         |       |       |                               |             |
| 2                    | 1      | 2      | 1.5  | 0.5  | 1     | 1       | 1       | 0.5   | 0.5   | 22796.190                     | 1           |
|                      |        |        | 1.5  | 1.5  |       |         |         | 0.5   | 1.5   | 22796.850 <sup>e</sup>        | 4           |
|                      |        |        | 1.5  | 1.5  |       |         |         | 0.5   | 0.5   | 22796.945                     | -1          |
|                      |        |        | 1.5  | 2.5  |       |         |         | 0.5   | 1.5   | 22797.949                     | 2           |
|                      |        |        | 2.5  | 3.5  |       |         |         | 1.5   | 2.5   | 22806.675 <sup>c</sup>        | 1           |
|                      |        |        | 2.5  | 2.5  |       |         |         | 1.5   | 1.5   | 22806.891                     | 0           |
|                      |        |        | 2.5  | 1.5  |       |         |         | 1.5   | 0.5   | 22807.030 <sup>c</sup>        | 1           |
|                      |        |        | 2.5  | 1.5  |       |         |         | 1.5   | 1.5   | 22807.569                     | -2          |
|                      |        |        | 2.5  | 2.5  |       |         |         | 1.5   | 2.5   | 22807.724                     | 1           |
|                      |        |        | 1.5  | 2.5  |       |         |         | 1.5   | 2.5   | 22827.256 <sup>f</sup>        | -14         |
| $0^- \leftarrow 0^-$ |        |        |      |      |       |         |         |       |       |                               |             |
| 2                    | 1      | 2      | 1.5  | 0.5  | 1     | 1       | 1       | 0.5   | 0.5   | 22796.095                     | -1          |
|                      |        |        | 1.5  | 1.5  |       |         |         | 0.5   | 1.5   | 22796.754                     | 0           |
|                      |        |        | 1.5  | 1.5  |       |         |         | 0.5   | 0.5   | 22796.850 <sup>e</sup>        | -3          |
|                      |        |        | 1.5  | 2.5  |       |         |         | 0.5   | 1.5   | 22797.855                     | 0           |
|                      |        |        | 2.5  | 3.5  |       |         |         | 1.5   | 2.5   | 22806.581                     | 0           |
|                      |        |        | 2.5  | 2.5  |       |         |         | 1.5   | 1.5   | 22806.799 <sup>c</sup>        | 0           |
|                      |        |        | 2.5  | 1.5  |       |         |         | 1.5   | 0.5   | 22806.936 <sup>c</sup>        | 0           |

Table S-II (*continue*)

| $N'$                 | $K'_a$ | $K'_c$ | $J'$ | $F'$ | $N''$ | $K''_a$ | $K''_c$ | $J''$ | $F''$ | obs. freq. <sup>a</sup> (MHz) | o.-c. (kHz) |
|----------------------|--------|--------|------|------|-------|---------|---------|-------|-------|-------------------------------|-------------|
|                      |        |        | 2.5  | 1.5  |       |         |         | 1.5   | 1.5   | 22807.479                     | 0           |
|                      |        |        | 2.5  | 2.5  |       |         |         | 1.5   | 2.5   | 22807.632                     | 1           |
|                      |        |        | 1.5  | 2.5  |       |         |         | 1.5   | 2.5   | 22827.184 <sup>f</sup>        | 7           |
| $0^+ \leftarrow 0^+$ |        |        |      |      |       |         |         |       |       |                               |             |
| 2                    | 1      | 1      | 1.5  | 0.5  | 1     | 1       | 0       | 0.5   | 0.5   | 30519.244                     | 1           |
|                      |        |        | 1.5  | 1.5  |       |         |         | 0.5   | 0.5   | 30519.761                     | 0           |
|                      |        |        | 1.5  | 1.5  |       |         |         | 0.5   | 1.5   | 30520.270                     | -3          |
|                      |        |        | 1.5  | 2.5  |       |         |         | 0.5   | 1.5   | 30521.112                     | 0           |
|                      |        |        | 2.5  | 3.5  |       |         |         | 1.5   | 2.5   | 30524.810                     | 1           |
|                      |        |        | 2.5  | 2.5  |       |         |         | 1.5   | 1.5   | 30525.007                     | 2           |
|                      |        |        | 2.5  | 1.5  |       |         |         | 1.5   | 0.5   | 30525.115 <sup>c</sup>        | 2           |
|                      |        |        | 2.5  | 2.5  |       |         |         | 1.5   | 2.5   | 30525.716 <sup>g</sup>        | 2           |
| $0^- \leftarrow 0^-$ |        |        |      |      |       |         |         |       |       |                               |             |
| 2                    | 1      | 1      | 1.5  | 0.5  | 1     | 1       | 0       | 0.5   | 0.5   | 30519.191                     | 2           |
|                      |        |        | 1.5  | 1.5  |       |         |         | 0.5   | 0.5   | 30519.707                     | 0           |
|                      |        |        | 1.5  | 1.5  |       |         |         | 0.5   | 1.5   | 30520.220                     | 1           |
|                      |        |        | 1.5  | 2.5  |       |         |         | 0.5   | 1.5   | 30521.058                     | 0           |
|                      |        |        | 2.5  | 3.5  |       |         |         | 1.5   | 2.5   | 30524.754                     | -2          |
|                      |        |        | 2.5  | 2.5  |       |         |         | 1.5   | 1.5   | 30524.953 <sup>c</sup>        | 3           |
|                      |        |        | 2.5  | 1.5  |       |         |         | 1.5   | 0.5   | 30525.056                     | -3          |
|                      |        |        | 2.5  | 2.5  |       |         |         | 1.5   | 2.5   | 30525.655 <sup>g</sup>        | -5          |
| $0^+ \leftarrow 0^+$ |        |        |      |      |       |         |         |       |       |                               |             |
| 2                    | 2      | 1      | 2.5  | 1.5  | 2     | 0       | 2       | 2.5   | 1.5   | 13757.533                     | 1           |
|                      |        |        | 2.5  | 2.5  |       |         |         | 2.5   | 2.5   | 13757.821                     | 0           |
|                      |        |        | 2.5  | 1.5  |       |         |         | 2.5   | 2.5   | 13758.229                     | -2          |
|                      |        |        | 2.5  | 3.5  |       |         |         | 2.5   | 3.5   | 13758.499                     | -1          |
|                      |        |        | 1.5  | 2.5  |       |         |         | 1.5   | 2.5   | 13808.465                     | 0           |
|                      |        |        | 1.5  | 1.5  |       |         |         | 1.5   | 2.5   | 13808.656                     | -2          |
|                      |        |        | 1.5  | 2.5  |       |         |         | 1.5   | 1.5   | 13809.649                     | 0           |
|                      |        |        | 1.5  | 1.5  |       |         |         | 1.5   | 1.5   | 13809.844                     | 2           |
| $0^- \leftarrow 0^-$ |        |        |      |      |       |         |         |       |       |                               |             |
| 2                    | 2      | 1      | 2.5  | 1.5  | 2     | 0       | 2       | 2.5   | 1.5   | 13757.625                     | -1          |
|                      |        |        | 2.5  | 2.5  |       |         |         | 2.5   | 2.5   | 13757.916                     | 0           |
|                      |        |        | 2.5  | 1.5  |       |         |         | 2.5   | 2.5   | 13758.327                     | 1           |
|                      |        |        | 2.5  | 3.5  |       |         |         | 2.5   | 3.5   | 13758.594                     | 0           |



Table S-II (*continue*)

| $N'$                                                  | $K'_a$ | $K'_c$ | $J'$ | $F'$ | $N''$ | $K''_a$ | $K''_c$ | $J''$ | $F''$ | obs. freq. <sup>a</sup> (MHz) | o.-c. (kHz) |
|-------------------------------------------------------|--------|--------|------|------|-------|---------|---------|-------|-------|-------------------------------|-------------|
|                                                       |        |        | 1.5  | 2.5  |       |         |         | 1.5   | 2.5   | 13808.558                     | -1          |
|                                                       |        |        | 1.5  | 1.5  |       |         |         | 1.5   | 2.5   | 13808.753                     | 0           |
|                                                       |        |        | 1.5  | 2.5  |       |         |         | 1.5   | 1.5   | 13809.744                     | 1           |
|                                                       |        |        | 1.5  | 1.5  |       |         |         | 1.5   | 1.5   | 13809.937                     | 1           |
| $0^+ \leftarrow 0^+ \text{ \& } 0^- \leftarrow 0^-^h$ |        |        |      |      |       |         |         |       |       |                               |             |
| 1                                                     | 1      | 0      | 1.5  | 1.5  | 0     | 0       | 0       | 0.5   | 0.5   | 17883.584 <sup>f</sup>        | -1          |
|                                                       |        |        | 1.5  | 0.5  |       |         |         | 0.5   | 0.5   | 17884.135 <sup>f</sup>        | -1          |
|                                                       |        |        | 1.5  | 2.5  |       |         |         | 0.5   | 1.5   | 17884.606                     | -1          |
|                                                       |        |        | 1.5  | 1.5  |       |         |         | 0.5   | 1.5   | 17885.316                     | 1           |
|                                                       |        |        | 1.5  | 0.5  |       |         |         | 0.5   | 1.5   | 17885.866 <sup>f</sup>        | -1          |
|                                                       |        |        | 0.5  | 1.5  |       |         |         | 0.5   | 0.5   | 17918.854                     | -1          |
|                                                       |        |        | 0.5  | 0.5  |       |         |         | 0.5   | 0.5   | 17919.366                     | -1          |
|                                                       |        |        | 0.5  | 1.5  |       |         |         | 0.5   | 1.5   | 17920.584 <sup>f</sup>        | -1          |
|                                                       |        |        | 0.5  | 0.5  |       |         |         | 0.5   | 1.5   | 17921.097 <sup>f</sup>        | 0           |
| $0^+ \leftarrow 0^+ \text{ \& } 0^- \leftarrow 0^-^h$ |        |        |      |      |       |         |         |       |       |                               |             |
| 2                                                     | 1      | 1      | 2.5  | 1.5  | 1     | 0       | 1       | 1.5   | 0.5   | 35078.778 <sup>e</sup>        | -6          |
|                                                       |        |        | 2.5  | 2.5  |       |         |         | 1.5   | 1.5   | 35078.804                     | 1           |
|                                                       |        |        | 2.5  | 3.5  |       |         |         | 1.5   | 2.5   | 35079.132                     | 0           |
|                                                       |        |        | 2.5  | 2.5  |       |         |         | 1.5   | 2.5   | 35080.039                     | 2           |
|                                                       |        |        | 1.5  | 0.5  |       |         |         | 0.5   | 1.5   | 35102.228 <sup>i</sup>        | 1           |
|                                                       |        |        | 1.5  | 1.5  |       |         |         | 0.5   | 1.5   | 35102.746                     | 2           |
|                                                       |        |        | 1.5  | 2.5  |       |         |         | 0.5   | 1.5   | 35103.583                     | -1          |
|                                                       |        |        | 1.5  | 0.5  |       |         |         | 0.5   | 0.5   | 35104.412                     | 2           |
|                                                       |        |        | 1.5  | 1.5  |       |         |         | 0.5   | 0.5   | 35104.926                     | -2          |
|                                                       |        |        | 1.5  | 2.5  |       |         |         | 1.5   | 2.5   | 35111.414 <sup>i,j</sup>      | -2          |
| $0^- \leftarrow 0^+$                                  |        |        |      |      |       |         |         |       |       |                               |             |
| 1                                                     | 1      | 1      | 1.5  | 1.5  | 0     | 0       | 0       | 0.5   | 0.5   | 14025.948 <sup>g</sup>        | 1           |
|                                                       |        |        | 1.5  | 2.5  |       |         |         | 0.5   | 1.5   | 14026.847                     | 1           |
|                                                       |        |        | 1.5  | 1.5  |       |         |         | 0.5   | 1.5   | 14027.672 <sup>g</sup>        | -4          |
| $0^+ \leftarrow 0^-$                                  |        |        |      |      |       |         |         |       |       |                               |             |
| 1                                                     | 1      | 1      | 1.5  | 1.5  | 0     | 0       | 0       | 0.5   | 0.5   | 14025.829 <sup>g</sup>        | -2          |
|                                                       |        |        | 1.5  | 2.5  |       |         |         | 0.5   | 1.5   | 14026.731                     | 1           |
|                                                       |        |        | 1.5  | 1.5  |       |         |         | 0.5   | 1.5   | 14027.562 <sup>g</sup>        | 1           |

<sup>a</sup> Lines without superscript letter were observed by FTMW spectroscopy, and estimated error of 3 kHz are given in the least-squares analysis using the spfit program.

- <sup>b</sup> Very broad line. Not included in the least-squares analysis.
- <sup>c</sup> Doppler component(s) of the line is(are) overlapping with other(s). Estimated error of 6 kHz is given in the least-squares analysis.
- <sup>d</sup> Observed by the FTMW-MW double resonance technique. Estimated error of 6 kHz is given in the least-squares analysis.
- <sup>e</sup> The line is overlapping with other. Estimated error of 6 kHz is given in the least-squares analysis.
- <sup>f</sup> Broader line observed. Estimated error of 6 kHz is given in the least-squares analysis.
- <sup>g</sup> Very weak line observed. Estimated error of 6 kHz is given in the least-squares analysis.
- <sup>h</sup> Tunnel splitting is not observed in *c*-type transitions. The observed line frequency is processed as the averaged frequencies for the  $0^+ \leftarrow 0^+$  &  $0^- \leftarrow 0^-$  components in the least squares fit.
- <sup>i</sup> Observed by the FTMW-MW double resonance technique. Estimated error of 20 kHz is given in the least-squares analysis.
- <sup>j</sup> Only the  $0^+ \leftarrow 0^+$  component is observed by monitoring  $1_{01}-0_{00}$  ( $J = 1.5-0.5$ ,  $F = 2.5-1.5$ ,  $0^+ \leftarrow 0^+$ ) line @ 13330.285 MHz.

## A model calculation for the $C$ constant of $\text{HOSO}_2$

For a simplification, we made following assumptions.

- The structure of the  $\text{SO}_3$  frame is invariant during the OH torsional motion.
- The  $c$ -axis is fixed to the  $\text{SO}_3$  frame, perpendicular to the plane involving three O atoms, through the S atom, as illustrated in Fig. S-I.

The inertial moment of the proton with respect to the fixed  $c$ -axis is written as a function of the torsional coordinate  $\alpha$ ,

$$I_{\text{H}}^C(\alpha)/M_{\text{H}} = \left\{ (R_{\text{SO}} + R_{\text{OH}} \cos(\pi - \gamma)) \cdot \cos\left(\beta - \frac{\pi}{2}\right) + R_{\text{OH}} \sin(\pi - \gamma) \sin\left(\beta - \frac{\pi}{2}\right) \cos\alpha \right\}^2 + \{R_{\text{OH}} \sin(\pi - \gamma) \sin\alpha\}^2, \quad (1)$$

where  $M_{\text{H}}$  is the mass of proton. The values of  $R_{\text{SO}}$ ,  $R_{\text{OH}}$ ,  $\beta$ , and  $\gamma$  are fixed to those at the theoretical equilibrium structure in Fig. 1 of the main text, 1.607 Å, 0.968 Å, 102.92°, and 107.69°, respectively. Then, eq. (1) is rewritten as

$$I_{\text{H}}^C(\alpha) = M_{\text{H}} \{ (1.853 + 0.206 \cos\alpha)^2 + (0.922 \sin\alpha)^2 \}. \quad (2)$$

The contribution of the  $\text{SO}_3$  frame,  $I_{\text{SO}_3}^C$ , is constant from the above assumptions, fixed to 98.65 uÅ<sup>2</sup> in the present calculation in order to reproduce the experimental  $C$  constant well.

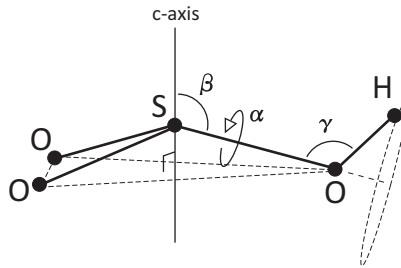

Figure S-I: Structural parameters for a model calculation of the  $C$  constant.  $\alpha$  is the torsional coordinate. The OH bond is parallel to the  $c$ -axis and the proton is above the plane involving three O atoms at  $\alpha = 0$ .  $\beta$  and  $\gamma$  are fixed to 102.92° and 107.69°, respectively.

The total  $I^C(\alpha)$  value is the sum of  $I_{\text{H}}^C(\alpha)$  and  $I_{\text{SO}_3}^C$ . The rotational constant  $C$  is then obtained by calculating the expectation value of the inverse of  $I^C(\alpha)$  using the wavefunction obtained from the tunnel splitting calculation described in the discussion of the main text. The  $C$  constant of HOSO<sub>2</sub> is then calculated to be 4910.69577 and 4910.69558 MHz for the  $0^+$  and  $0^-$  sublevels, respectively, assuming the potential barrier of  $1150 \text{ cm}^{-1}$  ( $V_1=0$  and  $V_2 = 1150 \text{ cm}^{-1}$ ). For DOSO<sub>2</sub>, a similar calculation gives a much smaller difference in the  $C$  constant,  $8 \times 10^{-4} \text{ kHz}$  (the  $C$  constant of  $0^+$  is larger).
